# Supplementary material for: Versatile sensing platform of an innovative copper oxide-assisted Cu-phenolic coordination nanosheet-mediated fluorophore-tagged GT-rich SSA-based fluorescence ON–OFF biosensor for the subsequent detection of Cd2+ and S2− ions
Source: Royal Society of Chemistry journal article supplement (doi:10.1039/d1nj05804e), 2022-01-01
Supplement: d1nj05804e1.pdf [file d1nj05804e1.pdf]

### Supporting Information

#### Versatile Sensing Platform of Innovative Copper Oxide Assisted Cu-Phenolic Coordination Nanosheet mediated Fluorophore tagged GT-rich SSA based Fluorescence ON-OFF Biosensor for Subsequent Detection of Cd<sup>2+</sup> and S<sup>2-</sup> Ions

Rajaji Pavadai and Panneerselvam Perumal\*

Department of Chemistry, SRM Institute of Science and Technology, Kattankulathur, 603 203,  
Tamil Nadu, India.

Table

S1.

| Target | DNA sequences (from 5' to 3'-FAM)         |
|--------|-------------------------------------------|
| Cd -1  | 5'-GGACTGTTATGCTATTATTTTTGGTTGTGC-FAM-3'  |
| Cd -2  | 5'-GGACTGTTATGCTATTATTTTTGCTTGTGC-FAM-3'  |
| Cd -3  | 5'-GGACTGTAGTGCTATTATTTTTGCTTGAGC-FAM-3'  |
| Cd -4  | 5'-GGACTGTTGTGCTATTATTTTTGCTAGTGC-FAM-3'  |
| Cd-5   | 5'-GGACTGTTGTGGTATTATTTTTGGTTGTGC-FAM-3'  |
| Cd -6  | 5'-GGACTGCCGTGGTATTATTTTTCCTAGTGC-FAM-3'  |
| Cd -7  | 5'-GGACCGATGTGGTATTATTTTTGGTAGTGC-FAM-3'  |
| Cd -8  | 5'-GGACAGCCGTCGTATTATTTTTGGATGAGC-FAM-3'  |
| Cd -9  | 5'-GCACTGAAGTGCTATAATTTTTGCTAGTGC-FAM-3'  |
| Cd -10 | 5'-GCACTGAAGTCGTCATATTTTTCCGTACTGC-FAM-3' |

Comparison of various Cd-SSA

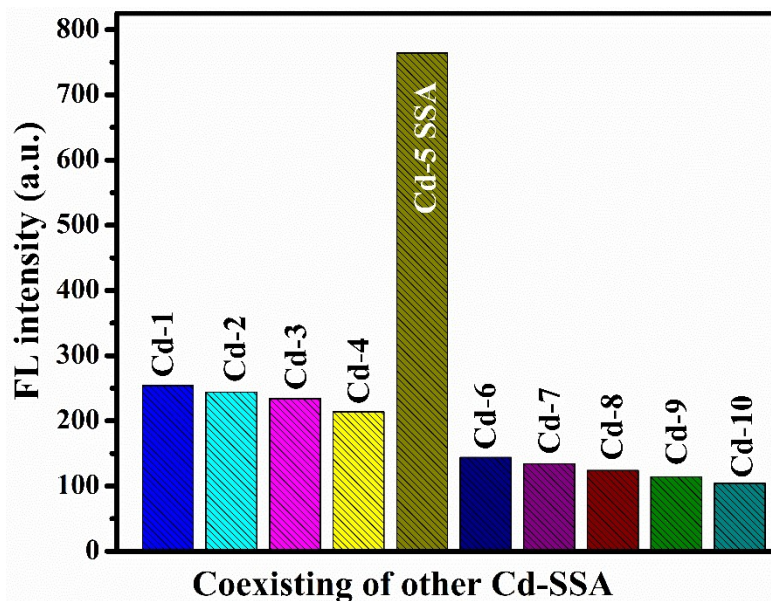

**Figure S1.** Comparison of various Cd-SSA

**Table S2.** Comparison of other methods used to identification of Cd<sup>2+</sup> ions

| Method     | Detection Probe                               | Target           | LOD     | Real water samples                   | Ref.      |
|------------|-----------------------------------------------|------------------|---------|--------------------------------------|-----------|
| CM         | SAA-DTC-Ag NPs                                | Cd <sup>2+</sup> | 5.8 μM  | drinking, tap, canal and river water | 1         |
| EM         | BZNA/GCE                                      | Cd <sup>2+</sup> | 1.62 pM | industry, municipal tap and sea      | 2         |
| SERS       | PMTTP                                         | Cd <sup>2+</sup> | 20 μM   | -                                    | 3         |
| CM         | Au NPs/3-MPA-abc                              | Cd <sup>2+</sup> | 20 nM   | drinking, tap and lake               | 4         |
| Paper-ISEs | SWCNTs/Au/Polymer                             | Cd <sup>2+</sup> | 1.2 nM  | -                                    | 5         |
| FM         | Cu-PCNS mediated FAM tagged GT-rich SSA Probe | Cd <sup>2+</sup> | 0.3 nM  | tap, lake and river                  | This work |

FM-fluorescence method, CM-colorimetric method, EM-electrochemical method, SERS-surface enhanced Raman scattering method and ISEs-ion selective electrodes

**Table S3.** Comparison of other methods used to identification of S<sup>2-</sup> ions

| Method | Detection Probe                                         | Target          | LOD       | Real samples        | Ref.         |
|--------|---------------------------------------------------------|-----------------|-----------|---------------------|--------------|
| CM     | GBR                                                     | S <sup>2-</sup> | 25.3 μM   | Ganga and sewage    | 6            |
| EM     | GCE/GO@PQn                                              | S <sup>2-</sup> | 700 nM    | blood               | 7            |
| RRS    | Ag <sub>2</sub> Te-NCs                                  | S <sup>2-</sup> | 7.8 ng/mL | river               | 8            |
| OFL    | HRP/ADHP                                                | S <sup>2-</sup> | 10 nM     | -                   | 9            |
| CM     | 2D/2D MoS <sub>2</sub> /g-C <sub>3</sub> N <sub>4</sub> | S <sup>2-</sup> | 37 nM     | tap and drinking    | 10           |
| FM     | Cu-PCNS mediated FAM<br>tagged GT-rich SSA Probe        | S <sup>2-</sup> | 3.3 nM    | tap, lake and river | This<br>work |

FM-fluorescence method, CM-colorimetric method, EM-electrochemical method, RRS-Resonance Rayleigh scattering sensor and OFL-optofluidic catalytic laser

## REFERENCE

1. V. N. Mehta, J. V. Rohit, S. K. Kailasa. *New Journal of Chemistry*, 2016, 40, 4566-4574.
2. R. M. El-Shishtawy, H. A. Al-Ghamdi, M. M. Alam, Z. M. Al-amshany, A. M Asiri, M. M. Rahman, *Chemical Engineering Journal*, 2018, 352, 225-231.
3. F. Cheng, H. Xu, C. Wang, Z. Gong, C. Tang, M. Fan, *RSC advances*, 2014, 4, 64683-64687.
4. J. Qiu, Z. Li, L. Miao, H. Wang, Y. Zhang, S. Wu, Y. Zhang, X. Li, A. Wu, *Analyst*, 2019, 144, 5081-5089.
5. S. T. Mensah, Y. Gonzalez, P. Calvo-Marzal, K. Y. Chumbimuni-Torres, *Analytical chemistry*, 2014, 86, 7269-7273.
6. S Singh, K. Mitra, A. Shukla, R. Singh, R. K. Gundampati, N. Misra, P. Maiti, B. Ray, *Analytical chemistry*, 2017, 89, 783-791.
7. K. S. Devi, A. S. Kumar. *Analyst*, 2018, 143, 3114-3123.
8. S. Yan, R. Song, Y. Tang, *Analytical Methods*, 2016, 8, 3768-3773.
9. C. Gong, Y. Gong, M. K. Oo, Y. Wu, Y. Rao, X. Tan, X. Fan, *Biosensors and Bioelectronics*, 2017, 96, 351-357.
10. X. Liu, L. Huang, Y. Wang, J. Sun, T. Yue, W. Zhang, J. Wang, *Sensors and Actuators B: Chemical*, 2020, 306, 127565.
